# Supplementary material for: Assessment of Earthworm Services on Litter Mineralisation and Nutrient Release in Annual and Perennial Energy Crops (Zea mays vs. Silphium perfoliatum)
Source: MDPI journal article supplement (doi:10.3390/agriculture13020494), 2023-02-19
Supplement: s1 [file s1]

# Assessment of Earthworm Services on Litter Mineralisation and Nutrient Release in Annual and Perennial Energy Crops (*Zea mays* vs. *Silphium perfoliatum*)

Lena Wöhl <sup>1,\*</sup>, Thorsten Ruf <sup>2</sup>, Christoph Emmerling <sup>2</sup>, Jan Thiele <sup>1</sup> and Stefan Schrader <sup>1</sup>

<sup>1</sup> Thünen Institute of Biodiversity, Bundesallee 65, D-38116 Braunschweig, Germany

<sup>2</sup> Department of Soil Science, Faculty of Regional and Environmental Sciences, University of Trier, Campus II, Behringstraße 21, D-54296 Trier, Germany

\* Correspondence: l.woehl@outlook.de

## Supplementary Information

**Table S1.** Initial and final earthworm biomass (raw) [g] (means  $\pm$  SE, n = 5) for cup plant and maize treatments for 4 and 8 weeks of incubation. Primary = primary decomposer *L. terrestris*; Secondary = secondary decomposers *A. caliginosa* and *A. rosea*; Mix = primary and secondary decomposers.

|         |           | <u>Cup plant</u>                    |                                   | <u>Maize</u>                        |                                   |
|---------|-----------|-------------------------------------|-----------------------------------|-------------------------------------|-----------------------------------|
|         |           | Initial earthworm biomass (raw) [g] | Final earthworm biomass (raw) [g] | Initial earthworm biomass (raw) [g] | Final earthworm biomass (raw) [g] |
| 4 weeks | Primary   | 12.95 $\pm$ 0.11                    | 12.42 $\pm$ 0.48                  | 12.68 $\pm$ 0.23                    | 13.80 $\pm$ 0.29                  |
|         | Mix       | 7.99 $\pm$ 0.16                     | 8.69 $\pm$ 0.30                   | 8.04 $\pm$ 0.05                     | 9.26 $\pm$ 0.13                   |
|         | Secondary | 3.76 $\pm$ 0.02                     | 3.84 $\pm$ 0.13                   | 4.04 $\pm$ 0.01                     | 4.37 $\pm$ 0.08                   |
| 8 weeks | Primary   | 12.48 $\pm$ 0.09                    | 11.81 $\pm$ 0.24                  | 12.11 $\pm$ 0.02                    | 11.84 $\pm$ 0.21                  |
|         | Mix       | 8.33 $\pm$ 0.05                     | 8.44 $\pm$ 0.20                   | 8.33 $\pm$ 0.10                     | 8.56 $\pm$ 0.22                   |
|         | Secondary | 3.69 $\pm$ 0.01                     | 3.49 $\pm$ 0.23                   | 3.94 $\pm$ 0.02                     | 4.21 $\pm$ 0.16                   |

**Table S2.** Remaining litter biomass, decomposition rate  $k$  and weekly consumption rate  $C$  [ $\text{g g}^{-1}$ ] (means  $\pm$  SE,  $n = 5$ ) for cup plant and maize treatments for 4 and 8 weeks of incubation. Control = no earthworms (i.e., no consumption rate); Primary = primary decomposer *L. terrestris*; Secondary = secondary decomposers *A. caliginosa* and *A. rosea*; Mix = primary and secondary decomposers. For statistics see Table 3 of the main article and Table S6 of the Supplementary Information.

|         |           | <u>Remaining litter biomass [g]</u> |                   | <u>Decomposition rate <math>k</math></u> |                   | <u>Consumption rate <math>C</math> [<math>\text{g g}^{-1}</math>]</u> |                   |
|---------|-----------|-------------------------------------|-------------------|------------------------------------------|-------------------|-----------------------------------------------------------------------|-------------------|
|         |           | Cup plant                           | Maize             | Cup plant                                | Maize             | Cup plant                                                             | Maize             |
| 4 weeks | Control   | 6.652 $\pm$ 0.253                   | 9.016 $\pm$ 0.233 | 0.021 $\pm$ 0.001                        | 0.010 $\pm$ 0.001 |                                                                       |                   |
|         | Primary   | 3.794 $\pm$ 0.405                   | 6.736 $\pm$ 0.374 | 0.042 $\pm$ 0.004                        | 0.021 $\pm$ 0.002 | 0.129 $\pm$ 0.012                                                     | 0.068 $\pm$ 0.008 |
|         | Mix       | 5.430 $\pm$ 0.546                   | 7.838 $\pm$ 0.283 | 0.029 $\pm$ 0.004                        | 0.015 $\pm$ 0.001 | 0.126 $\pm$ 0.027                                                     | 0.064 $\pm$ 0.010 |
|         | Secondary | 6.822 $\pm$ 0.241                   | 7.896 $\pm$ 0.178 | 0.020 $\pm$ 0.001                        | 0.015 $\pm$ 0.001 | 0.139 $\pm$ 0.020                                                     | 0.127 $\pm$ 0.013 |
| 8 weeks | Control   | 5.264 $\pm$ 0.109                   | 6.048 $\pm$ 0.092 | 0.015 $\pm$ 0.000                        | 0.012 $\pm$ 0.000 |                                                                       |                   |
|         | Primary   | 1.353 $\pm$ 0.129                   | 1.796 $\pm$ 0.192 | 0.039 $\pm$ 0.002                        | 0.034 $\pm$ 0.002 | 0.102 $\pm$ 0.002                                                     | 0.097 $\pm$ 0.003 |
|         | Mix       | 2.250 $\pm$ 0.312                   | 2.436 $\pm$ 0.163 | 0.031 $\pm$ 0.002                        | 0.029 $\pm$ 0.001 | 0.127 $\pm$ 0.006                                                     | 0.124 $\pm$ 0.003 |
|         | Secondary | 4.304 $\pm$ 0.271                   | 3.242 $\pm$ 0.137 | 0.018 $\pm$ 0.001                        | 0.023 $\pm$ 0.001 | 0.183 $\pm$ 0.011                                                     | 0.220 $\pm$ 0.007 |

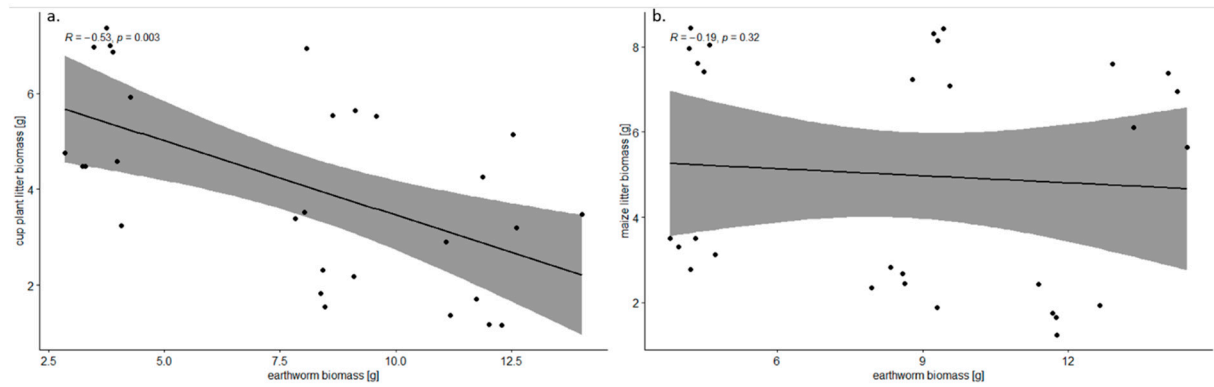

**Figure S1.** a.) final cup plant litter biomass [g] and b.) final maize litter biomass [g] the respective final earthworm biomasses (raw) [g] averaged over duration of incubation. Measured biomasses are indicated by dots. Confidence intervals are indicated by the grey area and correlation coefficients derived from Spearman's rank correlation are given in each plot.

**Table S3.** Total litter derived  $C_{litter}$ ,  $N_{litter}$  and  $P_{litter}$  inputs [mg] (means  $\pm$  SE,  $n = 5$ ) of primary decomposers *L. terrestris* (Primary), secondary decomposers *A. caliginosa* and *A. rosea* (Secondary), a mix of both decomposer guilds (Mix) and the Control (without earthworms) in cup plant and maize treatments after 4 and 8 weeks of incubation. Standard error combined according to Higgins et al. (2020). For statistics see Table 3 and Table S6 of the Supplementary Information.

|         |           | Cup plant           |                    |                    | Maize              |                    |                    |
|---------|-----------|---------------------|--------------------|--------------------|--------------------|--------------------|--------------------|
|         |           | total $C_{litter}$  | total $N_{litter}$ | total $P_{litter}$ | total $C_{litter}$ | total $N_{litter}$ | total $P_{litter}$ |
|         |           | [mg]                | [mg]               | [mg]               | [mg]               | [mg]               | [mg]               |
| 4 weeks | Control   | 2227.0 $\pm$ 738.8  | 15.1 $\pm$ 26.5    | 6.12 $\pm$ 5.19    | 1168.8 $\pm$ 808.0 | 13.1 $\pm$ 46.8    | 0.47 $\pm$ 3.48    |
|         | Primary   | 3607.0 $\pm$ 984.1  | 57.2 $\pm$ 34.5    | 13.17 $\pm$ 7.50   | 2883.4 $\pm$ 922.1 | 111.5 $\pm$ 42.9   | 12.60 $\pm$ 2.84   |
|         | Mix       | 3088.0 $\pm$ 1274.8 | 47.7 $\pm$ 36.1    | 9.90 $\pm$ 8.57    | 2344.2 $\pm$ 781.8 | 76.0 $\pm$ 42.9    | 7.71 $\pm$ 3.05    |
|         | Secondary | 2428.4 $\pm$ 642.9  | 28.4 $\pm$ 22.0    | 4.62 $\pm$ 5.33    | 1887.8 $\pm$ 619.4 | 53.8 $\pm$ 36.7    | 4.67 $\pm$ 2.42    |
| 8 weeks | Control   | 2820.1 $\pm$ 346.7  | 4.4 $\pm$ 19.1     | 4.70 $\pm$ 3.71    | 2427.1 $\pm$ 415.3 | 41.6 $\pm$ 31.7    | 3.41 $\pm$ 1.76    |
|         | Primary   | 4479.1 $\pm$ 108.9  | 81.6 $\pm$ 4.5     | 18.11 $\pm$ 1.04   | 4468.9 $\pm$ 491.4 | 165.4 $\pm$ 27.4   | 18.73 $\pm$ 1.12   |
|         | Mix       | 4218.3 $\pm$ 692.3  | 73.4 $\pm$ 23.7    | 16.54 $\pm$ 5.14   | 4323.4 $\pm$ 432.1 | 157.5 $\pm$ 27.5   | 17.84 $\pm$ 1.09   |
|         | Secondary | 3276.4 $\pm$ 744.7  | 38.8 $\pm$ 28.8    | 8.95 $\pm$ 6.40    | 3819.9 $\pm$ 473.2 | 134.4 $\pm$ 30.4   | 15.35 $\pm$ 1.40   |

Higgins, J.P.T.; Thomas, J.; Chandler, J.; Cumpston, M.; Li, T.; Page, M.J.; Welch, V.A. Cochrane Handbook for Systematic Reviews of Interventions; version 6.1., 2020. Available online: [www.training.cochrane.org/handbook](http://www.training.cochrane.org/handbook) (accessed on 16 December 2020).

**Table S4.** Total C and N [g kg<sup>-1</sup>] and plant-available CAL-P [CAL-P<sub>cast</sub> 10<sup>-3</sup> g kg<sup>-1</sup>] in casts (means ± SE, n = 5) in cup plant and maize treatments for 4 and 8 weeks of incubation for earthworm treatments Primary = primary decomposer *L. terrestris*; Secondary = secondary decomposers *A. caliginosa* and *A. rosea*; Mix = primary and secondary decomposers. For statistics see Table 3 of the main article and Table S6 of the Supplementary Information.

|         |           | <u>Cup plant</u>                              |                                               |                                                              | <u>Maize</u>                                  |                                               |                                                              |
|---------|-----------|-----------------------------------------------|-----------------------------------------------|--------------------------------------------------------------|-----------------------------------------------|-----------------------------------------------|--------------------------------------------------------------|
|         |           | Total C <sub>cast</sub> [g kg <sup>-1</sup> ] | Total N <sub>cast</sub> [g kg <sup>-1</sup> ] | CAL-P <sub>cast</sub> [10 <sup>-3</sup> g kg <sup>-1</sup> ] | Total C <sub>cast</sub> [g kg <sup>-1</sup> ] | Total N <sub>cast</sub> [g kg <sup>-1</sup> ] | CAL-P <sub>cast</sub> [10 <sup>-3</sup> g kg <sup>-1</sup> ] |
| 4 weeks | Primary   | 27.39±2.20                                    | 2.31±0.08                                     | 81.00±4.62                                                   | 24.73±1.93                                    | 2.57±0.10                                     | 69.47±3.39                                                   |
|         | Mix       | 21.83±1.44                                    | 2.23±0.06                                     | 68.91±2.33                                                   | 23.32±1.15                                    | 2.57±0.12                                     | 66.60±2.05                                                   |
|         | Secondary | 21.07±0.49                                    | 2.19±0.05                                     | 67.96±1.67                                                   | 20.86±0.32                                    | 2.52±0.06                                     | 63.67±0.68                                                   |
| 8 weeks | Primary   | 31.30±1.16                                    | 2.56±0.04                                     | 97.47±2.55                                                   | 23.31±0.98                                    | 2.42±0.11                                     | 61.57±2.15                                                   |
|         | Mix       | 26.42±1.00                                    | 2.34±0.07                                     | 87.57±5.32                                                   | 19.71±0.70                                    | 2.11±0.05                                     | 57.39±1.05                                                   |
|         | Secondary | 23.42±0.51                                    | 2.41±0.02                                     | 81.24±1.97                                                   | 23.17±0.52                                    | 2.40±0.06                                     | 63.52±1.72                                                   |

**Figure S2.** Total C [ $\text{g kg}^{-1}$ ] in casts per mean earthworm biomass [g] (means  $\pm$  SE,  $n = 5$ ) in cup plant and maize treatments for 4 and 8 weeks of incubation for earthworm treatments Primary = primary decomposer *L. terrestris*; Secondary = secondary decomposers *A. caliginosa* and *A. rosea*; Mix = primary and secondary decomposers. For statistics see Table S5 of the Supplementary Information.

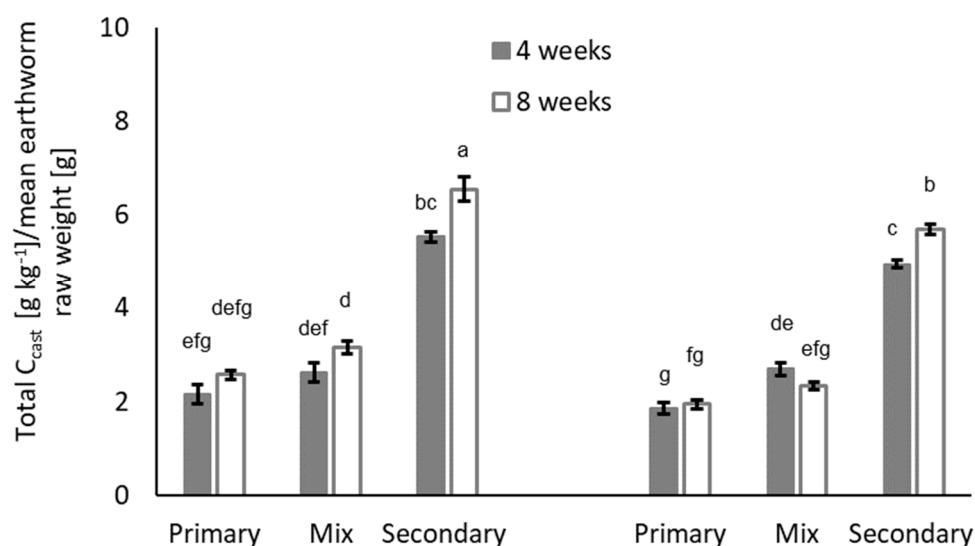

**Figure S3.** Total N [ $\text{g kg}^{-1}$ ] in casts per mean earthworm biomass [g] (means  $\pm$  SE,  $n = 5$ ) in cup plant and maize treatments for 4 and 8 weeks of incubation for earthworm treatments Primary = primary decomposer *L. terrestris*; Secondary = secondary decomposers *A. caliginosa* and *A. rosea*; Mix = primary and secondary decomposers. For statistics see Table S5 of the Supplementary Information.

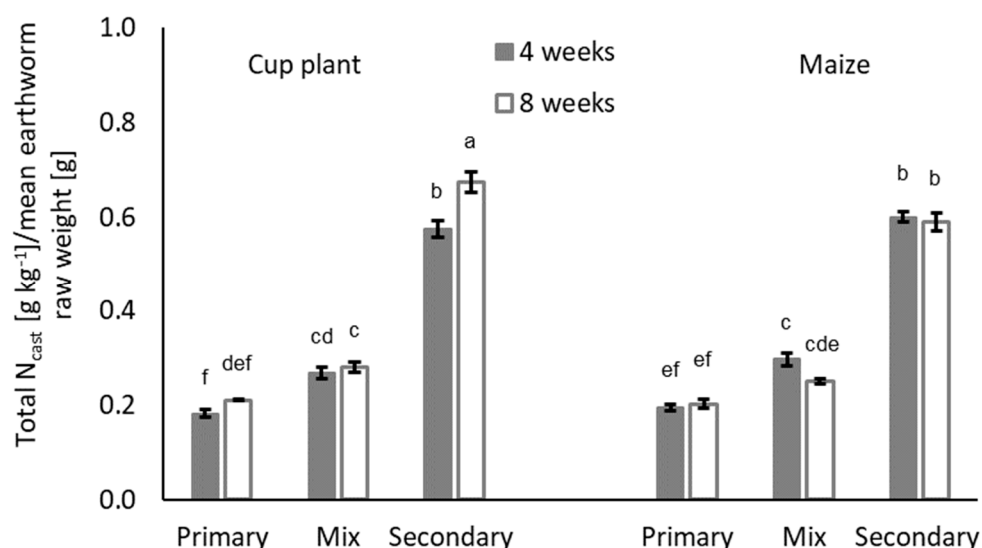

**Figure S4.** Total CAL-P [ $10^{-6}$  g  $\text{kg}^{-1}$ ] in casts per mean earthworm biomass [g] (means  $\pm$  SE,  $n = 5$ ) in cup plant and maize treatments for 4 and 8 weeks of incubation for earthworm treatments Primary = primary decomposer *L. terrestris*; Secondary = secondary decomposers *A. caliginosa* and *A. rosea*; Mix = primary and secondary decomposers. For statistics see Table S5 of the Supplementary Information.

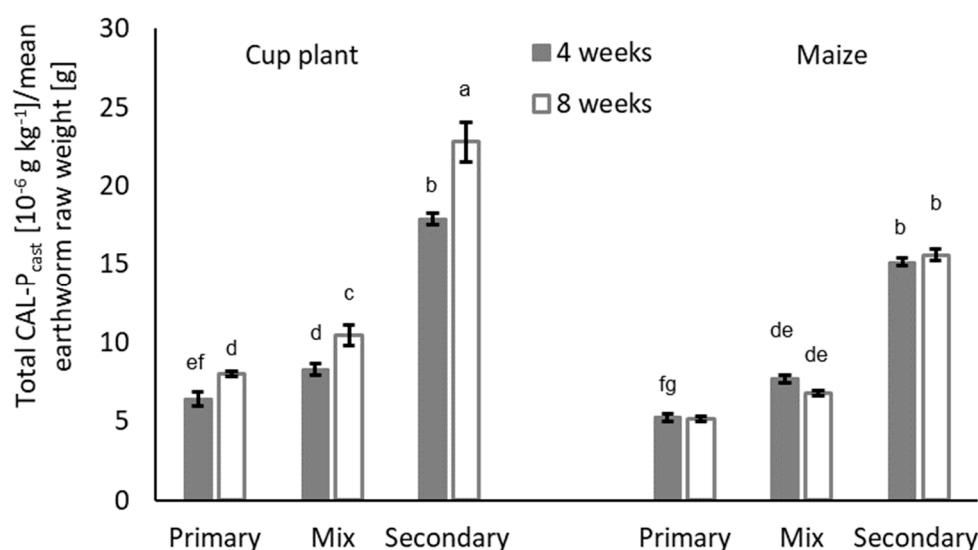

**Table S5.** ANOVA results for Total  $C_{\text{cast}}$ , Total  $N_{\text{cast}}$  [ $\text{g kg}^{-1}$ ] and Total  $\text{CAL-P}_{\text{cast}}$  [ $10^{-6}$  g  $\text{kg}^{-1}$ ] in casts per mean earthworm biomass [g] (means  $\pm$  SE,  $n = 5$ ) for the predictor variables Earthworm, Litter, Duration as well as their interactions (Earthworm:Litter, Earthworm:Duration, Litter:Duration), F and p values (F,  $\text{Pr(>F)}$ ) are provided. Estimates for regression coefficients  $\pm$  SE as well as t and p values (t,  $\text{Pr(>|t|)}$ ) are given for specific predictors within treatments.

| Predictor                                                                                               | Estimate | SE Estimate | F/t/z value | Pr(>F)/Pr(> t ) |
|---------------------------------------------------------------------------------------------------------|----------|-------------|-------------|-----------------|
| <b>Total <math>C_{\text{cast}}</math> [<math>\text{g kg}^{-1}</math>]/mean earthworm raw weight [g]</b> |          |             |             |                 |
| Earthworm                                                                                               |          |             | 155.41      | < 0.001***      |
| EarthwormPrimary                                                                                        | -3.1069  | 0.1854      | -16.76      | < 0.001***      |
| EartwormMix                                                                                             | -2.4139  | 0.1845      | -13.09      | < 0.001***      |
| Litter                                                                                                  |          |             | 7.39        | 0.009**         |
| LitterCup plant                                                                                         | 0.4741   | 0.1743      | 2.72        | 0.009**         |
| Duration                                                                                                |          |             | 12.84       | < 0.001***      |
| Duration8 weeks                                                                                         | 0.6248   | 0.1743      | 3.58        | < 0.001***      |
| Earthworm:Litter                                                                                        |          |             | 1.40        | 0.257           |
| EarthwormPrimary:LitterCup plant                                                                        | -0.2504  | 0.2162      | -1.16       | 0.252           |
| EarthwormMix:LitterCup plant                                                                            | -0.3447  | 0.2130      | -1.62       | 0.112           |
| Earthworm:Duration                                                                                      |          |             | 7.65        | 0.001**         |
| EarthwormPrimary:Duration8 weeks                                                                        | -0.6263  | 0.2162      | -2.90       | 0.006**         |
| EarthwormMix:Duration8 weeks                                                                            | -0.7910  | 0.2130      | -3.71       | < 0.001***      |
| Litter:Duration                                                                                         |          |             | 8.04        | 0.007**         |
| LitterCup plant:Duration8 weeks                                                                         | 0.4981   | 0.1756      | 2.84        | 0.007**         |
| <b>Total <math>N_{\text{cast}}</math> [<math>\text{g kg}^{-1}</math>]/mean earthworm raw weight [g]</b> |          |             |             |                 |
| Earthworm                                                                                               |          |             | 279.36      | < 0.001***      |

|                                                                                                                 |         |        |        |            |
|-----------------------------------------------------------------------------------------------------------------|---------|--------|--------|------------|
| EarthwormPrimary                                                                                                | -0.3842 | 0.0170 | -22.63 | < 0.001*** |
| EartwormMix                                                                                                     | -0.2901 | 0.0169 | -17.17 | < 0.001*** |
| Litter                                                                                                          |         |        | 0.01   | 0.928      |
| LitterCup plant                                                                                                 | -0.0015 | 0.0160 | -0.09  | 0.928      |
| Duration                                                                                                        |         |        | 0.59   | 0.448      |
| Duration8 weeks                                                                                                 | 0.0122  | 0.0160 | 0.77   | 0.448      |
| Earthworm:Litter                                                                                                |         |        | 1.59   | 0.215      |
| EarthwormPrimary:LitterCup plant                                                                                | -0.0309 | 0.0198 | -1.56  | 0.125      |
| EarthwormMix:LitterCup plant                                                                                    | -0.0296 | 0.0195 | -1.52  | 0.136      |
| Earthworm:Duration                                                                                              |         |        | 5.01   | 0.010*     |
| EarthwormPrimary:Duration8 weeks                                                                                | -0.0243 | 0.0198 | -1.23  | 0.225      |
| EarthwormMix:Duration8 weeks                                                                                    | -0.0613 | 0.0195 | -3.15  | 0.003**    |
| Litter:Duration                                                                                                 |         |        | 15.21  | < 0.001*** |
| LitterCup plant:Duration8 weeks                                                                                 | 0.0627  | 0.0161 | 3.90   | < 0.001*** |
| <b>Total CAL-P<sub>cast</sub> [10<sup>-6</sup> g kg<sup>-1</sup>]/mean earthworm raw weight [g] (log scale)</b> |         |        |        |            |
| Earthworm                                                                                                       |         |        | 235.38 | < 0.001*** |
| EarthwormPrimary                                                                                                | -1.0743 | 0.0505 | -21.29 | < 0.001*** |
| EartwormMix                                                                                                     | -0.7131 | 0.0502 | -14.21 | < 0.001*** |
| Litter                                                                                                          |         |        | 8.05   | 0.007**    |
| LitterCup plant                                                                                                 | 0.1346  | 0.0475 | 2.84   | 0.007**    |
| Duration                                                                                                        |         |        | 0.00   | 0.976      |
| Duration8 weeks                                                                                                 | -0.0014 | 0.0475 | -0.03  | 0.976      |
| Earthworm:Litter                                                                                                |         |        | 0.81   | 0.452      |
| EarthwormPrimary:LitterCup plant                                                                                | 0.0509  | 0.0588 | 0.87   | 0.391      |
| EarthwormMix:LitterCup plant                                                                                    | -0.0222 | 0.0580 | -0.38  | 0.703      |
| Earthworm:Duration                                                                                              |         |        | 1.02   | 0.367      |
| EarthwormPrimary:Duration8 weeks                                                                                | -0.0264 | 0.0588 | -0.45  | 0.656      |
| EarthwormMix:Duration8 weeks                                                                                    | -0.0814 | 0.0580 | -1.40  | 0.167      |
| Litter:Duration                                                                                                 |         |        | 31.97  | < 0.001*** |
| LitterCup plant:Duration8 weeks                                                                                 | 0.2703  | 0.0478 | 5.66   | < 0.001*** |

---



**Table S6.** ANOVA results for the decomposition rate  $k$  and the consumption rate  $C$  [ $\text{g g}^{-1}$ ], litter derived total  $C$ ,  $N$  and  $P$  [ $\text{mg}$ ] and cast total  $C$  and  $N$  [%] as well as  $CAL\text{-}P$  [ $\text{mg kg}^{-1}$ ]. For the predictor variables Earthworm, Litter, Duration as wells as their interactions (Earthworm:Litter, Earthworm:Duration, Litter:Duration],  $F$  and  $p$  values ( $F$ ,  $\text{Pr}( > F )$ ) are provided. Estimates for regression coefficients  $\pm$  SE as well as  $t$  and  $p$  values ( $t$ ,  $\text{Pr}( > |t| )$ ) are given for specific predictors within treatments.

| Predictor                                                                 | Estimate | SE Estimate | F/t/z value | $\text{Pr}( > F ) / \text{Pr}( >  t  ) / \text{Pr}( >  z  )$ | Estimate                                                         | SE Estimate | F/t value | $\text{Pr}( > F ) / \text{Pr}( >  t  )$ |
|---------------------------------------------------------------------------|----------|-------------|-------------|--------------------------------------------------------------|------------------------------------------------------------------|-------------|-----------|-----------------------------------------|
| <b>Decomposition rate <math>k</math> (log scale)</b>                      |          |             |             |                                                              | <b>Consumption rate <math>C</math> (log scale)</b>               |             |           |                                         |
| Earthworm                                                                 |          |             | 23.51       | $< 0.001^{***}$                                              |                                                                  |             | 14.09     | $< 0.001^{***}$                         |
| EarthwormPrimary                                                          | 0.3224   | 0.0850      | 3.80        | $< 0.001^{***}$                                              | -0.5548                                                          | 0.1297      | -4.28     | $< 0.001^{***}$                         |
| EartwormMix                                                               | 0.0193   | 0.0845      | 0.23        | 0.8205                                                       | -0.6262                                                          | 0.1290      | -4.85     | $< 0.001^{***}$                         |
| EarthwormNone                                                             | -0.3878  | 0.0845      | -4.59       | $< 0.001^{***}$                                              |                                                                  |             |           |                                         |
| Litter                                                                    |          |             | 15.67       | $< 0.001^{***}$                                              |                                                                  |             | 2.47      | 0.1222                                  |
| LitterCup plant                                                           | 0.3059   | 0.0773      | 3.96        | $< 0.001^{***}$                                              | 0.1918                                                           | 0.1219      | 1.57      | 0.1222                                  |
| Duration                                                                  |          |             | 34.97       | $< 0.001^{***}$                                              |                                                                  |             | 31.40     | $< 0.001^{***}$                         |
| Duration8 weeks                                                           | 0.4570   | 0.0773      | 5.91        | $< 0.001^{***}$                                              | 0.6833                                                           | 0.1219      | 5.60      | $< 0.001^{***}$                         |
| Earthworm:Litter                                                          |          |             | 7.94        | $< 0.001^{***}$                                              |                                                                  |             | 4.73      | 0.0132*                                 |
| EarthwormPrimary:LitterCup plant                                          | 0.3905   | 0.0991      | 3.94        | $< 0.001^{***}$                                              | 0.4085                                                           | 0.1512      | 2.70      | 0.0094**                                |
| EarthwormMix:LitterCup plant                                              | 0.3114   | 0.0976      | 3.19        | $< 0.01^{**}$                                                | 0.3890                                                           | 0.1490      | 2.61      | 0.0119*                                 |
| EarthwormNone:LitterCup plant                                             | 0.4303   | 0.0976      | 4.41        | $< 0.001^{***}$                                              |                                                                  |             |           |                                         |
| Earthworm:Duration                                                        |          |             | 7.02        | $< 0.001^{***}$                                              |                                                                  |             | 3.13      | 0.0524(*)                               |
| EarthwormPrimary:Duration8 weeks                                          | 0.0505   | 0.0991      | 0.51        | 0.6123                                                       | -0.3458                                                          | 0.1512      | -2.29     | 0.0265*                                 |
| EarthwormMix:Duration8 weeks                                              | 0.1735   | 0.0976      | 1.78        | 0.0801(*)                                                    | -0.0360                                                          | 0.1490      | -0.24     | 0.8101                                  |
| EarthwormNone:Duration8 weeks                                             | -0.2612  | 0.0976      | -2.68       | 0.0094**                                                     |                                                                  |             |           |                                         |
| Litter:Duration                                                           |          |             | 63.91       | $< 0.001^{***}$                                              |                                                                  |             | 16.11     | $< 0.001^{***}$                         |
| LitterCup plant:Duration8 weeks                                           | -0.5559  | 0.0695      | -8.00       | $< 0.001^{***}$                                              | -0.4930                                                          | 0.1228      | -4.01     | $< 0.001^{***}$                         |
| <b>Litter-derived total <math>C</math> <math>C_{\text{litter}}</math></b> |          |             |             |                                                              | <b>Total <math>C</math> in cast <math>C_{\text{cast}}</math></b> |             |           |                                         |
| Earthworm                                                                 |          |             | 1283.54     | $< 0.001^{***}$                                              |                                                                  |             | 1.67      | 0.1995                                  |
| EarthwormPrimary                                                          | 903.05   | 49.87       | 18.11       | $< 0.001^{***}$                                              | 2.5609                                                           | 1.5020      | 1.71      | 0.0945(*)                               |
| EartwormMix                                                               | 397.61   | 49.84       | 7.98        | $< 0.001^{***}$                                              | 0.4219                                                           | 1.4945      | 0.28      | 0.7789                                  |
| EarthwormNone                                                             | -823.98  | 49.84       | -16.53      | $< 0.001^{***}$                                              |                                                                  |             |           |                                         |

|                                  |         |       |         |            |         |        |       |          |
|----------------------------------|---------|-------|---------|------------|---------|--------|-------|----------|
| Litter                           |         |       | 82.14   | < 0.001*** |         |        | 2.05  | 0.1588   |
| LitterCup plant                  | 412.44  | 45.51 | 9.06    | < 0.001*** | -2.0210 | 1.4126 | -1.43 | 0.1588   |
| Duration                         |         |       | 1571.38 | < 0.001*** |         |        | 0.00  | 0.9560   |
| Duration8 weeks                  | 1803.98 | 45.51 | 39.64   | < 0.001*** | 0.0784  | 1.4126 | 0.06  | 0.9560   |
| Earthworm:Litter                 |         |       | 160.68  | < 0.001*** |         |        | 4.20  | 0.0207*  |
| EarthwormPrimary:LitterCup plant | 368.08  | 57.65 | 6.39    | < 0.001*** | 5.0765  | 1.7514 | 2.90  | 0.0056** |
| EarthwormMix:LitterCup plant     | 320.82  | 57.55 | 5.57    | < 0.001*** | 2.3822  | 1.7257 | 1.38  | 0.1737   |
| EarthwormNone:LitterCup plant    | 727.51  | 57.55 | 12.64   | < 0.001*** |         |        |       |          |
| Earthworm:Duration               |         |       | 129.99  | < 0.001*** |         |        | 0.58  | 0.5658   |
| EarthwormPrimary:Duration8 weeks | -161.62 | 57.65 | -2.80   | 0.0051**   | -1.1119 | 1.7514 | -0.64 | 0.5285   |
| EarthwormMix:Duration8 weeks     | 164.66  | 57.55 | 2.86    | 0.0042**   | -1.8396 | 1.7257 | -1.07 | 0.2917   |
| EarthwormNone:Duration8 weeks    | -463.87 | 57.55 | -8.06   | < 0.001*** |         |        |       |          |
| Litter:Duration                  |         |       | 413.15  | < 0.001*** |         |        | 10.02 | 0.0027** |
| LitterCup plant:Duration8 weeks  | -827.87 | 40.73 | -20.33  | < 0.001*** | 4.5051  | 1.4231 | 3.17  | 0.0027** |

#### Litter-derived total N $N_{\text{litter}}$ (sqrt scale)

|                                  |         |        |         |            |         |        |       |            |
|----------------------------------|---------|--------|---------|------------|---------|--------|-------|------------|
| Earthworm                        |         |        | 211.825 | < 0.001*** |         |        | 0.12  | 0.8838     |
| EarthwormPrimary                 | 2.5950  | 0.4304 | 6.030   | < 0.001*** | 0.0349  | 0.0908 | 0.39  | 0.7021     |
| EarthwormMix                     | 1.0828  | 0.4300 | 2.518   | 0.0118*    | -0.0074 | 0.0903 | -0.08 | 0.9348     |
| EarthwormNone                    | -3.4228 | 0.4300 | -7.960  | < 0.001*** |         |        |       |            |
| Litter                           |         |        | 34.591  | < 0.001*** |         |        | 20.21 | < 0.001*** |
| LitterCup plant                  | -2.3094 | 0.3927 | -5.881  | < 0.001*** | -0.3838 | 0.0854 | -4.50 | < 0.001*** |
| Duration                         |         |        | 101.439 | < 0.001*** |         |        | 4.17  | 0.0465*    |
| Duration8 weeks                  | 3.9547  | 0.3927 | 10.072  | < 0.001*** | -0.1743 | 0.0854 | -2.04 | 0.0465*    |
| Earthworm:Litter                 |         |        | 12.899  | 0.0049**   |         |        | 0.63  | 0.5363     |
| EarthwormPrimary:LitterCup plant | 0.2653  | 0.4977 | 0.533   | 0.5940     | 0.0966  | 0.1058 | 0.91  | 0.3661     |
| EarthwormMix:LitterCup plant     | 0.7942  | 0.4966 | 1.599   | 0.1097     | 0.1064  | 0.1043 | 1.02  | 0.3127     |
| EarthwormNone:LitterCup plant    | 1.6518  | 0.4966 | 3.327   | < 0.001*** |         |        |       |            |
| Earthworm:Duration               |         |        | 24.618  | < 0.001*** |         |        | 2.98  | 0.0601(*)  |
| EarthwormPrimary:Duration8 weeks | -0.6988 | 0.4977 | -1.404  | 0.1603     | 0.0055  | 0.1058 | 0.05  | 0.9587     |
| EarthwormMix:Duration8 weeks     | 0.1688  | 0.4966 | 0.340   | 0.7338     | -0.2188 | 0.1043 | -2.10 | 0.0410*    |

#### Total N in cast $N_{\text{cast}}$

|                                                             |         |        |         |            |                                                   |        |       |            |
|-------------------------------------------------------------|---------|--------|---------|------------|---------------------------------------------------|--------|-------|------------|
| EarthwormNone:Duration8 weeks                               | -2.0428 | 0.4966 | -4.114  | < 0.001*** |                                                   |        |       |            |
| Litter:Duration                                             |         |        | 61.458  | < 0.001*** |                                                   |        | 26.22 | < 0.001*** |
| LitterCup plant:Duration8 weeks                             | -2.7558 | 0.3515 | -7.840  | < 0.001*** | 0.4403                                            | 0.0860 | 5.12  | < 0.001*** |
| <b>Litter-derived total P P<sub>litter</sub> (^2 scale)</b> |         |        |         |            | <b>CAL-P in cast P<sub>cast</sub> (log scale)</b> |        |       |            |
| Earthworm                                                   |         |        | 112.576 | < 0.001*** |                                                   |        | 0.99  | 0.3805     |
| EarthwormPrimary                                            | 107.37  | 15.47  | 6.941   | < 0.001*** | 0.0511                                            | 0.0450 | 1.14  | 0.2613     |
| EartwormMix                                                 | 19.50   | 15.47  | 1.261   | 0.2074     | -0.0067                                           | 0.0447 | -0.15 | 0.8815     |
| EarthwormNone                                               | -53.79  | 15.47  | -3.478  | < 0.001*** |                                                   |        |       |            |
| Litter                                                      |         |        | 8.114   | 0.004**    |                                                   |        | 0.06  | 0.8156     |
| LitterCup plant                                             | -40.22  | 14.12  | -2.849  | 0.004**    | 0.0099                                            | 0.0423 | 0.24  | 0.8156     |
| Duration                                                    |         |        | 151.750 | < 0.001*** |                                                   |        | 1.87  | 0.1775     |
| Duration8 weeks                                             | 173.94  | 14.12  | 12.319  | < 0.001*** | -0.0579                                           | 0.0423 | -1.37 | 0.1775     |
| Earthworm:Litter                                            |         |        | 35.953  | < 0.001*** |                                                   |        | 4.13  | 0.0219*    |
| EarthwormPrimary:LitterCup plant                            | 73.81   | 17.87  | 4.130   | < 0.001*** | 0.1507                                            | 0.0524 | 2.87  | 0.0060**   |
| EarthwormMix:LitterCup plant                                | 74.97   | 17.86  | 4.198   | < 0.001*** | 0.0698                                            | 0.0517 | 1.35  | 0.1831     |
| EarthwormNone:LitterCup plant                               | 101.80  | 17.86  | 5.700   | < 0.001*** |                                                   |        |       |            |
| Earthworm:Duration                                          |         |        | 169.008 | < 0.001*** |                                                   |        | 0.58  | 0.5653     |
| EarthwormPrimary:Duration8 weeks                            | 37.09   | 17.87  | 2.076   | 0.0379*    | -0.0519                                           | 0.0524 | -0.99 | 0.3269     |
| EarthwormMix:Duration8 weeks                                | 81.16   | 17.86  | 4.544   | < 0.001*** | -0.0439                                           | 0.0517 | -0.85 | 0.3992     |
| EarthwormNone:Duration8 weeks                               | -138.18 | 17.86  | -7.737  | < 0.001*** |                                                   |        |       |            |
| Litter:Duration                                             |         |        | 35.839  | < 0.001*** |                                                   |        | 46.55 | < 0.001*** |
| LitterCup plant:Duration8 weeks                             | -75.62  | 12.63  | -5.987  | < 0.001*** | 0.2907                                            | 0.0426 | 6.82  | < 0.001*** |

Significance levels: P<0.001\*\*\*; P<0.01\*\*; P<0.05\*; P<0.1(\*)
